# Supplementary material for: Navigating Purchase Intentions: The Influence of Reviewers’ Comments on Consumer Behavior
Source: Preprints.org preprint supplement (doi:10.20944/preprints202405.0903.v1), 2024-05-14
Supplement: Supplementary file 1 [file supplementary]

BİLİMSEL ARAŞTIRMALAR ETİK KURULU

02.06.2022

Dear Sabina Kwakye

Your application titled **“Seeking product information on Social Media and the effect of the reviewer’s comments on purchase intention”** with the application number NEU/SS/2022/1318 has been evaluated by the Scientific Research Ethics Committee and granted approval. You can start your research on the condition that you will abide by the information provided in your application form.

Assoc. Prof. Dr. Direnç Kanol

Rapporteur of the Scientific Research Ethics Committee



**Note:**If you need to provide an official letter to an institution with the signature of the Head of NEU Scientific Research Ethics Committee, please apply to the secretariat of the ethics committee by showing this document.
