# Supplementary material for: Navigating Purchase Intentions: The Influence of Reviewers’ Comments on Consumer Behavior
Source: Preprints.org preprint supplement (doi:10.20944/preprints202405.0903.v1), 2024-05-14
Supplement: Supplementary file 2 [file supplementary]

Archive with 2 entries (2 files):
- ETHICS APPROVAL.pdf
- authors' bio.docx
