# Supplementary material for: Navigating Purchase Intentions: The Influence of Reviewers’ Comments on Consumer Behavior
Source: Preprints.org preprint supplement (doi:10.20944/preprints202405.0903.v1), 2024-05-14
Supplement: Supplementary file 2 [file supplementary › authors' bio.docx]

**Topic: Navigating Purchase Intentions: The Influence of Reviewers’ Comments on Consumer Behavior**

**Authors’ Biography**

**Correspondence:** Sabina Kwakye

Sabina Kwakye, is a PhD Candidate in the Business Administration Department Faculty of Economics and Administrative Sciences, at Near East University, Nicosia/TRNC, Turkey. [20195048@std.neu.edu.tr](mailto:20195048@std.neu.edu.tr) / [sabinakwakye9@gmail.com](mailto:sabinakwakye9@gmail.com).

Assoc. Prof Dr Ahmet Ertugan is the Chairperson of the Marketing Department, at the Faculty of Economics and Administrative Sciences, Near East University, Nicosia/TRNC, Turkey. [ahmet.ertugan@neu.edu.tr](mailto:ahmet.ertugan@neu.edu.tr)

Assoc. Prof Dr. Laith Tashtoush, is a Lecturer at the Business Administration Department, Faculty of Economics and Administrative Sciences, at the Near East University, Nicosia/TRNC, Turkey. [laith.tashtoush@neu.edu.tr](mailto:laith.tashtoush@neu.edu.tr) / ORCID: https://orcid.org/0000-0001-7364-1712
